# Supplementary material for: Catalytic olefin hydrogenation using N-heterocyclic carbene–phosphine complexes of iridium
Source: Royal Society of Chemistry journal article supplement (doi:10.1039/b208403a), 2002-01-01
Supplement: b208403a.doc [file b208403a.doc]

# Supporting information for:

Catalytic olefin hydrogenation using N-heterocyclic carbene-phosphine complexes of iridium

Leslie D. Vázquez-Serrano, Bridget T. Owens and Jillian M. Buriak*

Department of Chemistry, 1393 Brown Laboratories, Purdue University, West Lafayette, IN 47907-1393, USA. Fax: (765) 494-0239; Tel: (765) 496-3491; E-mail: buriak@purdue.edu

# Experimental Section

All starting materials and reagents were obtained from commercial sources and used as received unless otherwise noted. All reagents and solutions were handled under nitrogen or argon atmosphere through standard Schlenk techniques or in a Vacuum Atmospheres glovebox. 1H, 13C and 31P NMR spectra were obtained using a Varian spectrometer operating at 300 MHz, 75 MHz and 121 MHz respectively. Chemical shifts are reported in ppm with the residual solvent peak as an internal standard. Gas chromatography (GC) was carried out with a Varian Series CP-3800 equipped with a capillary column (Wcot Fused Silica 100 m x 0.25 mm ID Coating CP SIL PONA CB DF=0.5UM) and a flame ionization detector (FID). Hydrogenations were performed on a dual manifold Schlenk line with H2 fed directly into the manifold. Solvents were distilled under an inert atmosphere and dry over the usual drying agents or were purified by using a homemade Dow Chemical/Grubbs solvent purification system. [D2] Dichloromethane was purchased from Cambridge Isotope Laboratories and used as received. 1,3-dimethylimidazolium iodine,[[1]](#footnote-2) 1,3-bis(2,4,6-trimethylphenyl)-imidazolium chloride,[[2]](#footnote-3) potassium tert-butoxide[[3]](#footnote-4) and 1,3-bis(2,4,6-trimethylphenyl)imidazol-2-ylidene[[4]](#footnote-5) were prepared according to reported procedures. Non-stabilized dichloromethane was purchased from Fisher. Pyridine was distilled from calcium hydride. The olefins were purified by passage through a small column of activated alumina prior to use.

# SM Scheme 1. Synthesis of complexes

Reagents and conditions: (i) (a) 1 M NaOEt, EtOH, rt, 5.5 h (b) 1,3-dimethyimidazolium iodine, EtOH, r.t., 5 h; (ii) (a) AgPF6, 1:1 CH2Cl2/THF, r.t., 20 min (b) **L**, THF, r.t., 0.5-2 h.

# Reagents and conditions: (i) 1,3-bis(2,4,6-trimethylphenyl)-imidazol-2-ylidene, THF, r.t., 12 h; (ii) (a) AgPF6, THF, r.t., 20 min (b) P(*n* Bu)3, THF, r.t., 1-2 h.

**Iodo (η4-1,5-cyclooctadiene) (1,3-dimethylimidazoline-2-ylidene) iridium(I) (7):** A modification of the procedure reported by Herrmann[[5]](#footnote-6) was used. A 1 M sodium ethoxide (NaOEt) solution was prepared by adding Na metal (0.12 g, 5.217 mmol) in small pieces to EtOH (5.29 ml) at 0ºC in a 10 mL round bottom flask. It was stirred until the metal had been completely consumed. In an oven-dried 25 ml round bottom flask [Ir(COD)Cl]2 (757 mg, 1.126 mmol) was suspended in EtOH (14.8 mL), followed by addition of the freshly prepared NaOEt solution (4.50 mL). The color of the mixture changed from orange to yellow after stirring for 5.5 h. The 1,3-dimethylimidazolium iodine (503 mg, 2.254 mmol) was added and the reaction stirred at room temperature for another 5 h. The crude was concentrated under high vacuum and the residue was redissolved in CH2Cl2 and then filtered through celite to obtain a dark orange solution. Evaporation of the solvent under high vacuum and purification by crystallization from a solution 1:3 CH2Cl2/hexane yielded compound **7** as a dark orange solid (828 mg, 70%). 1H NMR (300 MHz, CDCl3) δ: 6.82 (s, 2H, -NCHCHN-), 4.75 (m, 2H, COD CH), 3.86 (s, 6H, -NCH3), 2.98 (m, 2H, COD CH), 2.05-2.27 (m, 4H, COD CH2), 1.65-1.85 (m, 2H, COD CH2), 1.30-1.50 (m, 2H, COD CH2). 13C NMR (75 MHz, CDCl3) δ: 207.48, 121.76, 82.52, 54.32, 37.26, 32.90, 30.33.

**Hexafluorophosphate (η4-1,5-cyclooctadiene) (1,3-dimethylimidazoline-2-ylidene) (triphenylphosphine) iridium(I) (2):** In a 4 mL dried vial protected from light with black tape, compound **8** (114 mg, 0.218 mmol) was dissolved in CH2Cl2 (0.36 mL) and THF (0.36 mL). A suspension of AgPF6 (55 mg, 0.218 mmol) in THF (0.73 mL) was prepared in a second vial, and was added to the vial containing compound **7**. This reaction mixture was stirred vigorously for 15 min, then filtered through celite into a 10 mL round bottom Schlenk flask. A solution of PPh3 (118 mg, 0.45 mmol) in THF (0.90 mL) was prepared in a vial and 0.48 mL (0.239 mmol) of this solution was added to the 10 mL round bottom Schlenk flask. After stirring for 0.5 h the reaction mixture was concentrated to dryness under high vacuum. Purification by crystallization from 1:3 CH2Cl2/hexane yielded compound **2** as a red solid (118 mg, 67%). 1H NMR (300 MHz, CDCl3) δ: 7.10-7.56 (m, 15H, Ar), 6.86 (s, 2H, -NCHCHN-), 4.38 (b s, 2H, COD CH), 3.78 (b s, 2H, COD CH), 3.49 (s, 6H, -NCH3), 2.20-2.45 (m, 4H, COD CH2), 1.90-2.20 (m, 4H, COD CH2). 13C NMR (75 MHz, CDCl3) δ: 174.09, 133.63, 133.49, 131.22, 130.60, 129.93, 129.01, 128.87, 123.49, 86.195, 86.038, 80.11, 37.14, 31.15, 30.68. 31P NMR (121 MHz, CDCl3) δ: 16.48 (PPh3), -146.12 (PF6). ESI-MS (m/z) M+ calcd for C31H35N2PIr 659.2266; found, 659.2263.

**Hexafluorophosphate (η4-1,5-cyclooctadiene) (1,3-dimethylimidazoline-2-ylidene) (tricyclohexylphosphine) iridium(I) (3):** In a 4 mL dried vial protected from light with black tape, compound **7** (48 mg, 0.092 mmol) was dissolved in CH2Cl2 (0.16 mL) and THF (0.16 mL). A suspension of AgPF6 (26 mg, 0.101 mmol) in THF (0.35 mL) was prepared in a second vial, and added to the vial containing compound **7**. This reaction mixture was stirred vigorously for 20 min, then filtered through celite into a 10 mL round bottom Schlenk flask. A solution of PCy3 (70 mg, 0.25 mmol) in THF (0.50 mL) was prepared in a vial and 0.20 mL (0.101 mmol) of this solution was added to the 10 mL round bottom Schlenk flask. After stirring for 0.5 h the reaction mixture was concentrated to dryness under high vacuum. Purification by crystallization from 1:3 CH2Cl2/hexane yielded compound **3** as a red solid (25 mg, 33%). 1H NMR (300 MHz, CDCl3) δ: 7.16 (s, 2H, -NCHCHN-), 4.50 (b s, 2H, COD CH), 3.84 (s, 6H, -NCH3), 3.74 (b s, 2H, COD CH), 1.00-2.30 (b m, 41H, PCy3 COD CH2). 13C NMR (75 MHz, CDCl3) δ: 123.62, 80.53, 80.37, 76.79, 37.70, 37.45, 37.15, 31.41, 30.34, 30.01, 27.77, 27.63, 26.07. 31P NMR (121 MHz, CDCl3) δ: 15.06 (PCy3), -146.10 (PF6). ESI-MS (m/z) M+ calcd for C31H52N2PIr 677.3575; found, 677.3565.

**Hexafluorophosphate (η4-1,5-cyclooctadiene) (1,3-dimethylimidazoline-2-ylidene) [tri(n-butyl)phosphine] iridium(I) (4):** In a 4 mL dried vial protected from light with black tape, compound **7** (141 mg, 0.269 mmol) was dissolved in CH2Cl2 (0.45 mL) and THF (0.45 mL). A suspension of AgPF6 (75 mg, 0.296 mmol) in THF (0.99 mL) was prepared in a second vial, and was added to the vial containing compound **7**. This reaction mixture was stirred vigorously for 15 min, then filtered through celite into a 10 mL round bottom Schlenk flask. A solution of P(n-Bu)3 (0.12 mL, 0.50 mmol) in THF (0.88 mL) was prepared in a vial and 0.70 mL (0.350 mmol) from this solution was added to the 10 mL round bottom Schlenk flask. After stirring for 5 h, it was concentrated to dryness under high vacuum. Purification by crystallization from 3:1 THF/hexane yielded compound **4** as a red solid (173 mg, 87%). 1H NMR (300 MHz, CDCl3) δ: 7.14 (s, 2H, -NCHCHN-), 4.17 (b s, 2H, COD CH), 4.12 (b s, 2H, COD CH), 3.82 (s, 6H, -NCH3), 1.93-2.30 (m, 8H, COD CH2), 1.25-1.65 (m, 18H, P(n-Bu)3), 0.91 [t, 9H, P(n-Bu)3]. 13C NMR (75 MHz, CDCl3) δ: 175.51, 123.46, 84.70, 84.54, 76.15, 37.17, 31.45, 30.70, 26.14, 24.29, 24.18, 24.11, 23.78, 13.52. 31P NMR (121 MHz, CDCl3): -0.46 [P(n-Bu)3], -146.13 (PF6). ESI-MS (m/z) M+ calcd for C25H47N2PIr 599.3106; found, 599.3108.

**Hexafluorophosphate (η4-1,5-cyclooctadiene)(1,3-dimethylimidazoline-2-ylidene) (pyridine) iridium(I) (6):** In a 4 mL dried vial protected from light with black tape, compound **7** (169 mg, 0.322 mmol) was dissolved in CH2Cl2 (0.54 mL) and THF (0.54 mL). A suspension of AgPF6 (90 mg, 0.354 mmol) in THF (1.18 mL) was prepared in a second vial, and was added to the vial containing compound **7**. This reaction mixture was stirred vigorously for 20 min, then filtered through celite into a 10 mL round bottom Schlenk flask. A solution of pyridine (0.05 mL, 0.60 mmol) in THF (1.15 mL) was prepared in a vial and 0.84 mL (0.419 mmol) of this solution was added to the 10 mL round bottom Schlenk flask. After stirring for 1 h it was concentrated to dryness under high vacuum. Purification by crystallization from 1:1 chloroform/THF yielded compound **6** as an orange solid (160 mg, 80%). 1H NMR (300 MHz, CD2Cl2) δ: 8.58 (d, 2H, -NC*H*CHCH-), 7.80 (t, 1H, -NCHCHC*H*-), 7.50 (t, 2H, -NCHC*H*CH-), 6.91 (s, 2H, -NCHCHN-), 4.02 (s, 6H, -NCH3), 4.00 (b s, 2H, COD CH), 3.66 (b s, 2H, COD CH), 2.15-2.50 (m, 4H, COD CH2), 1.93 (q, 4H, COD CH2). 13C NMR (75 MHz, CD2Cl2): 176.53, 150.65, 138.60, 127.18, 123.13, 84.18, 64.21, 37.43, 32.78, 30.30. ESI-MS (m/z) M+ calcd for C18H25N2Ir 476.1677; found, 476.1685.

**Chloro(η4-1,5-cyclooctadiene)(1,3-bis(2,4,6-trimethylphenyl)-imidazol-2-ylidene)iridium(I) (8):** In a 10 mL oven dried round bottom flask [Ir(cod)Cl]2 (314 mg, 0.468 mmol) was dissolved in THF (0.94 mL). In a 4 mL vial, 1,3-bis(2,4,6-trimethylphenyl)imidazol-2-ylidene (320 mg, 1.05 mmol) was dissolved in THF (7 mL). This solution was added to the round bottom flask in a 5 min period. The solution became dark orange and was stirred for 12 h. Concentration to dryness followed by crystallization from 6:7 THF/*i* PrOH yielded compound **8** as an orange solid (313 mg, 52%). 1H NMR (300 MHz, CDCl3) δ: 7.00 (d, 4H, Ar H), 6.95 (s, 2H, -NCHCHN-), 4.15 (m, 2H, COD CH), 2.97 (m, 2H, COD CH), 2.36 (s, 12H, Ar 2-Me), 2.16 (s, 6H, Ar 4-Me), 1.55-1.80 (m, 4H, COD CH2), 1.18-1.45 (m, 4H, COD CH2). 13C NMR (75 MHz, CDCl3) δ: 180.77, 138.59, 136.05, 123.26, 82.51, 67.95, 51.41, 33.48, 28.91, 25.59, 21.10.

**Hexafluorophosphate (η4-1,5-cyclooctadiene) [1,3-bis(2,4,6-trimethylphenyl)-imidazol-2-ylidene] [tri(n-butyl)phosphine] iridium(I) (5):** In a 4 mL dried vial protected from light with black tape, compound **8** (100 mg, 0.156 mmol) was dissolved in THF (0.31 mL). A suspension of AgPF6 (44 mg, 0.172 mmol) in THF (0.59 mL) was prepared in a second vial, and was added to the vial containing compound **8**. This mixture was stirred vigorously for 15 min, then filtered through celite into a 10 mL round bottom Schlenk flask flask. A solution of P(*n* Bu)3 (0.087 mL, 0.45 mmol) in THF (0.70 mL) was prepared in a vial and 0.41 mL (0.203 mmol) of this solution was added to the 10 mL round bottom Schlenk flask. After stirring for 2.5 h, the reaction mixture was concentrated to dryness under high vacuum. Purification by crystallization from 1:1 THF/hexane yielded compound **5** as a red solid (129 mg, 87%). 1H NMR (300 MHz, CDCl3) δ: 7.27 (s, 2H, -NCHCHN-), 7.04 (s, 2H, Ar H), 7.01 (s, 2H, Ar H), 7.16 (m, 2H, COD CH), 3.68 (m, 2H, COD CH), 2.37 (s, 3H, Ar Me), 2.31 (s, 3H Ar Me), 2.20 (s, 3H, Ar Me), 0.83-1.98 [m, 26H, P(n Bu)3, COD CH2].  13C NMR (75 MHz, CDCl3) δ: 175.97, 139.89, 135.81, 135.71, 134.28, 129.79, 129.65, 129.15, 126.01, 82.00, 81.84, 73.78, 31.24, 30.89, 26.58, 24.38, 24.20, 23.81, 20.925, 20.23, 19.40, 19.32, 17.10, 13.703. 31P NMR (121 MHz, CDCl3): -1.42 [P(n-Bu)3], -146.18 (PF6). ESI-MS (m/z) M+ calcd for C41H63N2IrP 807.4358; found, 807.4362.

**Catalytic hydrogenation using carbene complexes at 1 mol% concentration:** The iridium complex (0.01 mmol) was added to a 10 mL round bottom Schlenk flask and dissolved in non-stabilized CH2Cl2[[6]](#footnote-7) (5 mL). The olefin (1.0 mmol) and 2.5 % (v/v) of cis-decahydronaphtalene as an internal standard were added. The atmosphere of the reaction mixture was exchanged from N2 to H2 by evacuation of the system and refilling three times and then the reaction stirred, recording the time. Aliquots of 0.2 mL were obtained from the reaction mixture every couple of minutes. A minimum of six samples per reaction was taken. Each aliquot was added to a small test tube containing a small amount of DIPHOS to stop hydrogenation and then filtered through a small plug of alumina into a 1 mL volumetric flask, and the volume of the solution was completed with non-stabilized CH2Cl2.

For the reaction at 0.1 mol %, 5.0 mmol of olefin and 0.005 mmol of the iridium complex were prepared in an analogous fashion using 10 mL of CH2Cl2.

# Parahydrogen-induced polarization NMR procedure: Parahydrogen was prepared according to the method of Bargon and co-workers.**[[7]](#footnote-8)** [Ir(COD)(IMe)(P(n-Bu)3]PF6 (4 mg, 0.0054 mmol) was weighed and placed into an NMR tube inside the dry box. CDCl3 (5.0 mL) and [D8] styrene (0.05 mL, 0.44 mmol) were added, taking care not to disturb the solid on the bottom. The tube was then sealed and removed from the dry box. It was immersed in liquid nitrogen and purged with parahydrogen for 1 min. The tube was stored in liquid nitrogen, then thawed, shaken and inserted into the NMR spectrometer. Two scans were immediately recorded; the process from shaking to accumulation took no more than 30 s. A large enhancement of the alkyl signals at δ = 2.6 and 1.2 was revealed which corresponds to the H of the methylene and the methyl, respectively, of the ethylbenzene hydrogenation product. Repeated removal of the tube, shaking, and reinsertion in the instrument (4 times) renewed the observed polarization. A 1H NMR spectrum taken 3 min. after shaking with parahydrogen showed loss of all polarization.

# SM Figure 1. Color changes for the hydrogenation of the olefins using the N-heterocyclic carbene-phosphine complexes


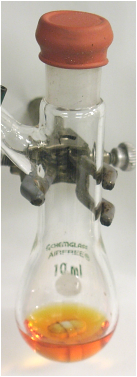

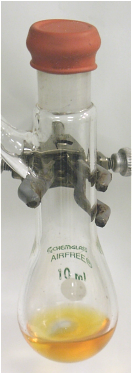

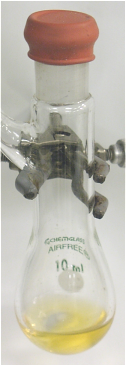

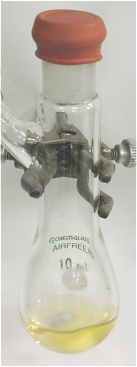

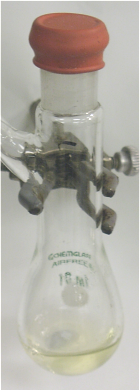

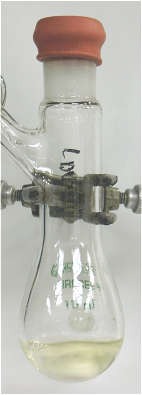


Initial

red-orange color

during hydrogenation

>98% conversion

Neon yellow color

The reaction changes from red-orange color during hydrogenation, to almost colorless at conversions >98%. After ~30 seconds, the final neon yellow color is observed.

1. W.A. Herrmann, C. Köcher, L.J. Gooβen and G.R.J. Artus, *Chem. Eur. J.* 1996, **2 (12)**, 1627. [↑](#footnote-ref-2)
2. A.J. Arduengo III. Preparation of 1,3-disubstituted Imidazolium Salts. U.S. Patent 5,077,414, 1991. [↑](#footnote-ref-3)
3. Org. Synth., Coll. Vol. 1963, **4**, 132. [↑](#footnote-ref-4)
4. A.J. Arduengo, H.V. Rasika Dias, R.L. Harlow and Kline, M. *J. Am. Chem. Soc.* 1992, **114**, 5530. [↑](#footnote-ref-5)
5. C. Köcher and W.A. Herrmann, *J. Organomet. Chem.* 1997, **532**, 261. [↑](#footnote-ref-6)
6. Non-stabilized dichloromethane was used as the solvent for the hydrogenations to avoid side reactions of the iridium complex with the cyclohexene that is used to stabilize the commercially available dichloromethane. [↑](#footnote-ref-7)
7. J. Bargon, J. Kandels and K. Woelk, *Z. Phys. Chem*, 1993, **180**, 65. [↑](#footnote-ref-8)
